# Supplementary material
Source: Springer Nature journal article supplement (https://www.springermedizin.de/resource/supplementary/12974_2012_668_MOESM1_ESM.pdf/9601708)
Supplement: MOESM1 [file 9601708]

### 1-way ANOVA LPS challenge

|               | serum                           | spleen                         | brain                           |
|---------------|---------------------------------|--------------------------------|---------------------------------|
| IFN- $\gamma$ | $F_{(2,15)} = 13.10$ p = 0.0002 | $F_{(2,15)} = 30.27$ p <0.0001 | $F_{(2,15)} = 5.056$ p = 0.0129 |
| IL-1 $\beta$  | $F_{(2,15)} = 48$ p <0.0001     | $F_{(2,15)} = 56.45$ p <0.0001 | $F_{(2,15)} = 40.97$ p <0.0001  |
| IL-12         | $F_{(2,15)} = 17.04$ p <0.0001  | $F_{(2,15)} = 2.643$ n.s.      | $F_{(2,15)} = 5.409$ p = 0.101  |

### 1-way ANOVA Salmonella infection

|               | serum                           | spleen                          | brain                           |
|---------------|---------------------------------|---------------------------------|---------------------------------|
| IFN- $\gamma$ | $F_{(3,20)} = 11.82$ p < 0.0001 | $F_{(3,20)} = 16.95$ p <0.0001  | $F_{(3,20)} = 5.820$ p = 0.0028 |
| IL-1 $\beta$  | $F_{(3,20)} = 1.533$ n.s.       | $F_{(3,20)} = 7.443$ p = 0.0008 | $F_{(3,20)} = 4.312$ p = 0.0112 |
| IL-12         | $F_{(3,20)} = 21.53$ p <0.0001  | $F_{(3,20)} = 11.15$ p <0.0001  | $F_{(3,20)} = 4.604$ p = 0.0085 |

### repeated measures ANOVA for weight loss and burrowing behaviour

|            | body weight                     | burrowing                      |
|------------|---------------------------------|--------------------------------|
| LPS        | $F_{(1,16)} = 26.68$ p < 0.0001 | $F_{(2,24)} = 288.6$ p <0.0001 |
| Salmonella | $F_{(4,20)} = 11.96$ p <0.0001  | $F_{(4,20)} = 11.64$ p <0.0001 |

### 2-way ANOVA IHC quantification

|        | Salmonella infection            | LPS injection                   | Interaction                    |
|--------|---------------------------------|---------------------------------|--------------------------------|
| CD68   | $F_{(1,10)} = 0.04$ p = 0.8443  | $F_{(1,10)} = 7.09$ p = 0.0238  | $F_{(1,10)} = 0.53$ p = 0.4826 |
| CD11b  | $F_{(1,10)} = 0.63$ p = 0.4441  | $F_{(1,10)} = 2.96$ p = 0.1161  | $F_{(1,10)} = 0.62$ p = 0.4509 |
| ICAM-1 | $F_{(1,14)} = 0.69$ p = 0.4212  | $F_{(1,14)} = 11.78$ p = 0.0040 | $F_{(1,14)} = 0.61$ p = 0.4478 |
| VCAM-1 | $F_{(1,14)} = 2.21$ p = 0.1596  | $F_{(1,14)} = 9.24$ p = 0.0088  | $F_{(1,14)} = 0.14$ p = 0.7106 |
| MHCI   | $F_{(1,14)} = 12.98$ p = 0.003  | $F_{(1,14)} = 5.42$ p = 0.0354  | $F_{(1,14)} = 1.11$ p = 0.3104 |
| MHCII  | $F_{(1,14)} = 24.81$ p = 0.0002 | $F_{(1,14)} = 24.81$ p = 0.0002 | $F_{(1,14)} = 10.0$ p = 0.0069 |
| CD11c  | $F_{(1,12)} = 11.68$ p = 0.0051 | $F_{(1,12)} = 8.19$ p = 0.0143  | $F_{(1,12)} = 5.59$ p = 0.0358 |

Abbreviations: ANOVA, analysis of variance; ICAM-1, intercellular adhesion molecule-1; IFN, interferon; IHC, immunohistochemistry; IL, interleukin; LPS, lipopolysaccharide; MCHI/I, major histocompatibility Class I/I; n.s., not significant; VCAM-1, vascular cell adhesion molecule-1.
